# Supplementary material for: Gene Regulation via the Combination of Transcription Factors in the INDETERMINATE DOMAIN and GRAS Families
Source: PubMed Central journal article supplement (PMC7349898; doi:10.3390/genes11060613), 2020-06-02
Supplement: genes-11-00613-s001.pdf [file genes-11-00613-s001.pdf]

(A)

**SCRp**

(bp)  
-1387 (AA)CAG**GTCC**AAAA (+)  
-1154 (GT)CTT**GTCCA**ATT (+)  
-1102 (CA)TTA**GTCC**CCTT (+)  
-1067 (GT)TT**TGTCT**AAAT (+)  
-489 (TG)TTC**GTCG**TTGT (-)  
-343 (TG)AAT**GTCG**CTTC (-)  
-312 (TC)TAA**GTCG**TCTT (-)  
-287 (TC)ACT**GTCC**TCCT (+)  
-278 (TC)CTC**GTCC**TCCT (+)  
-27 (TG)TT**GTCG**TGAG (-)

(B)

**SCL3p**

(bp)  
-2157 (AT)AAT**GTCG**GTGA (-)  
-1971 (CA)TT**TGTCT**CGT (-)  
-1513 (TT)TT**TGTCT**TCTT (-)  
-1481 (TC)TT**TGTCT**TTTT (-)  
-1458 (TC)ATT**GTC**TTTTC (-)  
-1434 (GA)TT**TGTCT**GTCT (-)  
-1333 (GT)TT**TGTCT**TTTGT (+)  
-1312 (GA)AAC**GTCC**AAAC (-)  
-607 (GT)TT**TGTCT**TCTT (-)  
-598 (TG)ATA**GTCG**GTTT (-)  
-584 (GC)ATT**GTC**TGGTA (+)

(C)

**GA3ox1**

(bp) (bp)  
-2879 (AG)ATT**GTCG**TGAA (+) -1929 (TA)TAT**GTCC**ATTT (+)  
-2791 (CA)CTA**GTCC**TTAA (-) -1899 (TT)ATT**GTC**TATTT (+)  
-2765 (CG)TGG**GTCC**TTTA (-) -1511 (AT)TT**TGTCC**ACTA (-)  
-2742 (TT)TT**TGTCT**TTTT (+) -1323 (AT)GT**GTCG**CTAG (-)  
-2690 (GC)CAA**GTCG**GATA (+) -1217 (AT)AT**GTCG**TACG (+)  
-2676 (TT)TT**TGTCT**TCTT (-) -1087 (TT)ATT**GTC**TATCT (+)  
-2376 (AA)CTG**GTCC**GTCG (+) -855 (AT)G**TTC**TTGTA (-)  
-2372 (GG)TCC**GTCG**AAAC (+) -818 (CT)TT**TGTCC**AAA (+)  
-2350 (AT)GGG**GTCC**TTGA (+) -738 (CC)AC**AGTCG**CTGG (+)  
-2320 (AT)TT**TGTCC**AAAA (+) -513 (TT)TT**TGTCT**CTTT (+)  
-2202 (AA)TT**TGTCT**TTAA (+) -485 (TT)ATT**GTCC**CTTT (+)  
-2123 (AA)TAG**GTCG**CGAA (+) -264 (TA)G**AGTCC**CGCC (-)  
-2050 (AT)AAT**GTCC**TTTT (-) -185 (GT)TT**TGTCC**AATA (-)

(D) **PIN1**

(bp)

-1259 (AT)AAA**GTCC**GTAC (-)  
 -935 (AT)AAG**GTCC**GAAAT (-)  
 -513 (GC)GGA**GTCC**AAAG (-)  
 -401 (TT)TTT**GTCC**GATT (+)  
 -150 (TT)TTT**GTCC**GTTG (-)  
 -52 (CT)TT**GTCT**TTAG (-)  
 +10 (TA)GAA**GTCC**GCCG (-)  
 +130 (GT)TTC**GTCC**GCTCT (+)  
 +238 (TC)ATT**GTCC**TCTC (+)  
 +294 (TT)ATG**GTCC**AATC (-)  
 +318 (GG)AGT**GTCC**GAGAG (-)  
 +385 (AT)GAG**GTCC**GCCG (-)  
 +532 (AT)AAT**GTCC**GAAAT (-)  
 +554 (AG)G**TTGTCT**TCCA (-)  
 +614 (TG)TTC**GTCC**TTCT (+)

(E) **YUC5**

|       |                                 |                                    |
|-------|---------------------------------|------------------------------------|
| (bp)  |                                 | (bp)                               |
| -2767 | (TA)GGT <b>GTCC</b> ATTG (-)    | -657 (AT)ATG <b>GTCC</b> AAAT (-)  |
| -2733 | (GA)TTG <b>GTCC</b> GTGGT (-)   | -609 (GA)TTG <b>GTCC</b> ATTG (+)  |
| -2662 | (GC)TTC <b>GTCC</b> GAAAC (+)   | -452 (TT)AGAG <b>GTCC</b> GTTT (-) |
| -2616 | (TC)CT <b>TTGTCT</b> AATT (-)   | -439 (TC)AAAG <b>GTCC</b> CATC (+) |
| -2451 | (TT)ATT <b>GTCC</b> AGAA (+)    | -212 (AC)TTC <b>GTCC</b> ACTA (+)  |
| -1975 | (CA)AGC <b>GTCC</b> GTTG (+)    | 38 (CT)TCT <b>GTCC</b> GAGG (-)    |
| -1868 | (CA)TTC <b>GTCC</b> GAAAG (+)   | 66 (TA)ACG <b>GTCC</b> TGTA (+)    |
| -1833 | (TT)TTT <b>GTCC</b> TTTA (-)    | 77 (TA)ATC <b>GTCC</b> GAGC (+)    |
| -1783 | (TT)TAG <b>GTCC</b> ATTT (-)    | 282 (GA)ACT <b>GTCC</b> TTTT (-)   |
| -1708 | (CA)GCAG <b>GTCC</b> GCCAG (+)  | 304 (CT)TGAG <b>GTCC</b> TACG (+)  |
| -1486 | (AT)CT <b>TTGTCT</b> CCTCAA (+) | 350 (AG)TGT <b>GTCC</b> AGTC (+)   |
| -1476 | (CA)TT <b>GTCT</b> TTTTG (-)    | 368 (GT)CTC <b>GTCC</b> GATC (-)   |
| -1390 | (TA)TT <b>GTCT</b> GAAA (-)     | 373 (CA)CT <b>TTGTCT</b> CGTC (-)  |
| -1378 | (AA)TTC <b>GTCC</b> GATTT (-)   | 397 (AT)G <b>TTGTCT</b> TTGAT (-)  |
| -1182 | (GT)TGC <b>GTCC</b> GTGA (-)    | 421 (TC)GGG <b>GTCC</b> GAGA (+)   |
| -1146 | (TT)TTG <b>GTCC</b> ATCG (-)    | 460 (CT)CCC <b>GTCC</b> CCAC (-)   |

Figure S1. Sequences of candidates of IDD binding sequence in the promoter of (A) *SCR*, (B) *SCL3*, (C) *GA3ox1*, (D) *PIN1*, and (E) *YUC5*. Numbers indicate the nucleotide numbers from the ATG of each gene. GTC(G/C) are in green and MGP binding sequences are shown in blue. (+): sense, (-): anti-sense.

Table S1. Primers used in this study.

| primer name                                          | sequence                         |
|------------------------------------------------------|----------------------------------|
| <b>construction of vectors for yeast experiments</b> |                                  |
| AtiDD1 BamHI F                                       | GGATCCGATGCCGGTTGATTTAGAT        |
| AtiDD1 PstI R                                        | CTGCAGCGAACTTCTTCCAATGTC         |
| AtiDD2 BamHI F                                       | GGGATCCGATGCCGGTAGATTTAGATAAC    |
| AtiDD2 XhoI R                                        | GCTCGAGTTATGATTTTCTTCTACTAATG    |
| AtiDD3 EcoRI F                                       | GAATTCATGACAACCTGAAGATCAGAC      |
| AtiDD3 BamHI R                                       | GGATCCTCAAATCCATCCATTGATAG       |
| AtiDD4 EcoRI F                                       | GGAATTCATGTCGTCATCATCATATAAC     |
| AtiDD4 PstI R                                        | GCTGCAGTCAACCTCTTCCAAATGG        |
| AtiDD5 BamHI F                                       | GGATCCGATGGCTGCTTCTTCATCC        |
| AtiDD5 PstI R                                        | CTGCAGGAACTCGCATGATGGAT          |
| AtiDD6 BamHI F                                       | GGGATCCGGATGTCTTCATCGTACAAC      |
| AtiDD6 Sall R                                        | GGTCGACTCAAGCTTTGCCATATG         |
| AtiDD7 EcoRI F                                       | GGAATTCATGATGATGAACAGAGAC        |
| AtiDD7 BamHI R                                       | GGGATCCTTAATCTTGGTGGCTATG        |
| AtiDD8 BamHI F                                       | GGATCCGATGACAAGTGAAGTTCTT        |
| AtiDD8 PstI R                                        | CTGCAGAATCCATCCATTGATAGA         |
| AtiDD9 BamHI F                                       | GGATCCGATGATGATGCCAGATGAT        |
| AtiDD9 PstI R                                        | CTGCAGCTGGTTCATGTCGGCGGT         |
| AtiDD10 BamHI F                                      | GGATCCCAGTGCAGATGATCCAGGA        |
| AtiDD10 PstI R                                       | CTGCAGTCAACCAATGGAGCAAACC        |
| AtiDD11 EcoRI F                                      | GGAATTCATGTTACTTCCACAGCATC       |
| AtiDD11 PstI R                                       | GCTGCAGCTATCCCTGCCAAGGCTTTG      |
| AtiDD12 BamHI F                                      | GGGATCCGGATGTTTTCTTCTCATTCTTG    |
| AtiDD12 PstI R                                       | GCTGCAGTTACATACGATGGGCCCTG       |
| AtiDD14 EcoRI F                                      | GAATTCATGATAGACTACGAGAGAAG       |
| AtiDD14 PstI R                                       | CTGCAGCTATGAAGATGCTCTATC         |
| AtiDD15 EcoRI F                                      | GAATTCATGAGAACAGATCAAGTG         |
| AtiDD15 BamHI R                                      | GGATCCAAAACCATTTTCCAACCTC        |
| AtiDD16 EcoRI F                                      | GGAATTCATGATACATTACGAACAAAAC     |
| AtiDD16 PstI R                                       | CTGCAGTCACTCGCATTCTCCTTC         |
| OsiD1 EcoRI F                                        | GGAATTCCTAGAAGTTGTGGCTCCAC       |
| OsiD1 Sall R                                         | GGTCGACATGGCGGCGGCGCAGGAG        |
| SHR EcoRI F                                          | GAATTCATGGATACTCTCTTTAGACTA      |
| SHR Sall R                                           | GTCGACTTACGTTGGCCGCCACGCACT      |
| SCL3 EcoRI F                                         | GGAATTCATGGTGGCTATGTTTCAAG       |
| SCL3 BamHI R                                         | GGGATCCTCACTTCTCGCATCTCCAAG      |
| GAI EcoRI F                                          | GGAATTCATGAAGAGAGATCATC          |
| GAI BamHI R                                          | GGGATCCCTAATTGGTGGAGAGTTTCC      |
| RGA BamHI F                                          | GGATCCGATGAAGAGAGATCATCAC        |
| RGA PstI R                                           | CTGCAGTCAGTACGCCGCCGTCGAG        |
| RGL1 BamHI F                                         | GGGATCCCAGTGAAGAGAGAGACAACCAC    |
| RGL1 Sall R                                          | GGTCGACTTATTCCACACGATTGATTC      |
| RGL2 Sall F                                          | GGTCGACCGATGAAGAGAGGATACGGAGAAAC |
| RGL2 PstI R                                          | GCTGCAGTCAGGCGAGTTTCCACGCCG      |
| RGL3 Sall F                                          | GGTCGACGATGAAACGAAGCCATCAAG      |
| RGL3 PstI R                                          | GCTGCAGCTACCGCCGCAACTCCGCCG      |
| SLR1 EcoRI F                                         | GGAATCCATGAAGCGCGAGTACCAAG       |
| SLR1 SmaI R                                          | GCCCGGGTCACGCCGCGGCGACGCGCC      |
| PIN1p a EcoRI F                                      | GGAATTCATACATTCAAAAAACTTC        |
| PIN1p a XhoI R                                       | GCTCGAGGAGCATTGGTCTGGTGTG        |
| PIN1p b EcoRI F                                      | GGAATTCGGCATAAACCGTTTCGTC        |
| PIN1p +650 BamHI R                                   | GGGATCCGTAATATCAGACCTTGAAG       |
| YUC5p a KpnI F                                       | GGGTACCCAAAAGGAGATAATCTTC        |
| YUC5p a XhoI R                                       | GCTCGAGCCTATAATTATAAATTTG        |
| YUC5p b KpnI F                                       | GGGTACCTAGGTTTACTCTAAATAG        |
| YUC5p b XhoI R                                       | GCTCGAGGCTTTATGGTATATATTG        |
| YUC5p c KpnI F                                       | GGGTACCAAGCAATTATATTATAATC       |
| YUC5p c XhoI R                                       | GCTCGAGTCCATCTTTAGGGGTGAG        |
| YUC5p d KpnI F                                       | GGGTACCGAGAACATGTTTAGGCTC        |
| YUC5p +500 Sall R                                    | GGTCGACGATCTCTGGAACAACCTTC       |

| primer name                                        | sequence                             |
|----------------------------------------------------|--------------------------------------|
| <b>construction of vectors for transient assay</b> |                                      |
| AtIDD1 XbaI F                                      | GTCTAGAATGCCGGTTGATTTAGATAA          |
| AtIDD1 BamHI R                                     | GGGATCCTTACGAACCTTCTCCAATGTC         |
| AtIDD6 XbaI F                                      | GCTCTAGAATGTCTTCATCGTACAACAC         |
| AtIDD6 BamHI R                                     | GGATCCTCAAGCTTTGCCATATGG             |
| AtIDD10 XbaI EcoRI F                               | GCTCTAGAGAATTCATGCAGATGATTCCAGGAG    |
| AtIDD10 XhoI R                                     | GCCTCGAGTCAACCCAATGGAGCAAACC         |
| AtIDD15 BamHI F                                    | GGGATCCATGAGAACAGATCAAGTGATG         |
| AtIDD15 SacI R                                     | GGAGCTCTTAAAAACCATTTTCCAATC          |
| AtIDD16 XbaI F                                     | GCTCTAGAATGGAGCTGACGCAACCC           |
| AtIDD16 BamHI R                                    | GCGGATCCTCACTCGCATTCTCCTTC           |
| SHR EcoRI F                                        | GAATTCATGGATACTCTCTTTAGACTA          |
| SHR Sall R                                         | GTCGACTTACGTTGGCCGCCACGCACT          |
| SCR EcoRI F                                        | GAATTCATGGCGGAATCCGGCGATTTTC         |
| SCR BamHI R                                        | GGATCCCTAAGAACGAGGCGTCCAAG           |
| SCL3 Sall F                                        | GGTCGACATGGTGGCTATGTTTCAAG           |
| SCL3 XbaI R                                        | GTCTAGAATGGTGGCTATGTTTCAAG           |
| RGA XbaI F                                         | GTCTAGAATGAAGAGAGATCATCCAATTCCAAG    |
| RGA BamHI R                                        | GGGATCCTCAGTACGCCGCCGTGAGAGTTTCCAAGC |
| SCRp HindIII F                                     | AAGCTTACAAAAGTCTAAAAATTG             |
| SCRp NcoI R                                        | GCCCATGGGGAGATTGAAGGGTTGTTGG         |
| SCL3p -2549 HindIII F                              | GAAGCTTTTGTAAACGAAGTCTGTTGTTTC       |
| SCL3p -2266 HindIII F                              | GAAGCTTAATGAAGTCTTTTATAAG            |
| SCL3p -1987 HindIII F                              | GAAGCTTGTATACACAAAAGCTACG            |
| SCL3p -1708 HindIII F                              | GAAGCTTTATGGATGCATATTTTTC            |
| SCL3p -1655 HindIII F                              | GAAGCTTAAAAAAAAGTTGAGGTAC            |
| SCL3p -1600 HindIII F                              | GAAGCTTTCTCTCTGGTCAATGGTC            |
| SCL3p -1540 HindIII F                              | GAAGCTTAAAAACAAGAGAGAGAG             |
| SCL3p -1485 HindIII F                              | GAAGCTTGAAGAAAAGACAAAAGAG            |
| SCL3p -1470 HindIII F                              | GAAGCTTGAGAAAAGTAATGAAAAG            |
| SCL3p -1453 HindIII F                              | GAAGCTTGACAATGAACATTTAAAG            |
| SCL3p -1437 HindIII F                              | GAAGCTTAGAAGACAGACAAATCCC            |
| SCL3p -1422 HindIII F                              | GAAGCTTCCCACACCCAAGCCTCAG            |
| SCL3p -992 HindIII F                               | GAAGCTTGGTGAACTTCTCTTATC             |
| SCL3p -425 NcoI R                                  | GCCATGGGGTTCTCTCAATCTTTATCTC         |
| SCL3p mutant 1 F                                   | AGAGAAAAGTAATGAAAAGAACATTT           |
| SCL3p mutant 1 R                                   | TGCTTCTTTAAATGTTCTTTTCAT             |
| SCL3p mutant 2 F                                   | AAGTAATGAAAAGACAATTTAAAGAA           |
| SCL3p mutant 2 R                                   | TTTGTCTGTCTTCTTTAAATTGTCT            |
| SCL3p mutant 3 F                                   | AGTAATGAAAAGACAATGGAAGACA            |
| SCL3p mutant 3 R                                   | TGGGATTTGTCTGTCTTCCATTGTCT           |
| GA3ox1p HindIII F                                  | GAAGCTTTAATGACACACAGTCACAC           |
| GA3ox1p Sall R                                     | GTCGACCTTGCTCTTTTTTAATTAG            |
| PIN1p Sall F                                       | GGTCGACTCCTCATTATATCATCAACC          |
| PIN1p BamHI R                                      | GGGATCCGTAATATCAGACCTTGAAG           |
| YUC5p PstI F                                       | GCTGCAGCTACAACACAAAAGGGAGC           |
| YUC5p Sall R                                       | GGTCGACGATCTCTGGAACAACTTTC           |
